# Supplementary material for: Intrinsic non-stoichiometry and anomalous transport properties of layered oxysulfide LaOPbBiS3
Source: Royal Society of Chemistry journal article supplement (doi:10.1039/d1tc03145g), 2021-01-01
Supplement: d1tc03145g1.pdf [file d1tc03145g1.pdf]

### Supplementary Information

#### Intrinsic non-stoichiometry and anomalous transport properties of layered oxysulfide LaOPbBiS<sub>3</sub>

Céline Roux-Byl<sup>†</sup>, David Berardan<sup>\*</sup>

ICMMO (UMR 8182 CNRS), Université Paris-Sud, Université Paris-Saclay, 91405 Orsay, France

<sup>\*</sup> Corresponding author: David Berardan, [david.berardan@u-psud.fr](mailto:david.berardan@u-psud.fr)

<sup>†</sup> Present address: C. Roux-Byl, LPEM, ESPCI Paris, PSL University – Sorbonne Université – CNRS, 10 rue Vauquelin, 75005 Paris, France

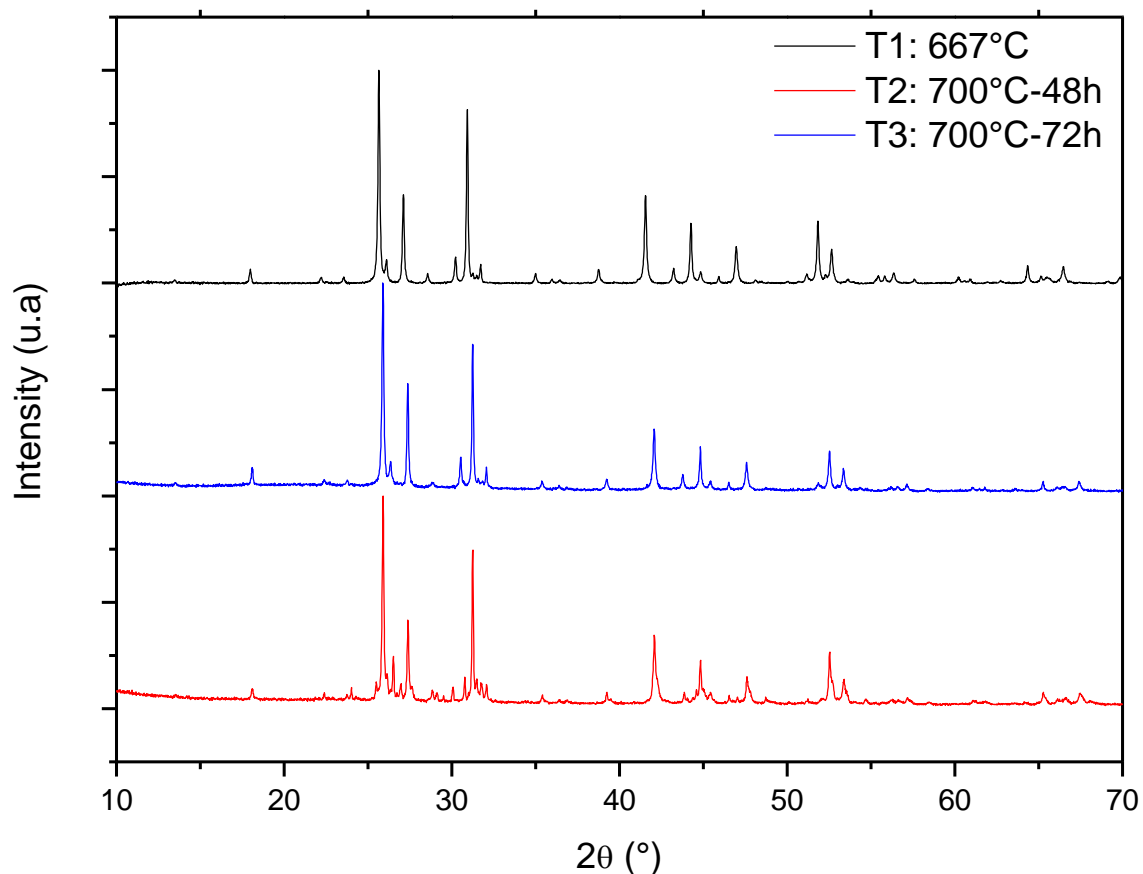

Figure S1: influence of successive thermal treatments on the amount of secondary phases of pristine LaOPbBiS<sub>3</sub>.

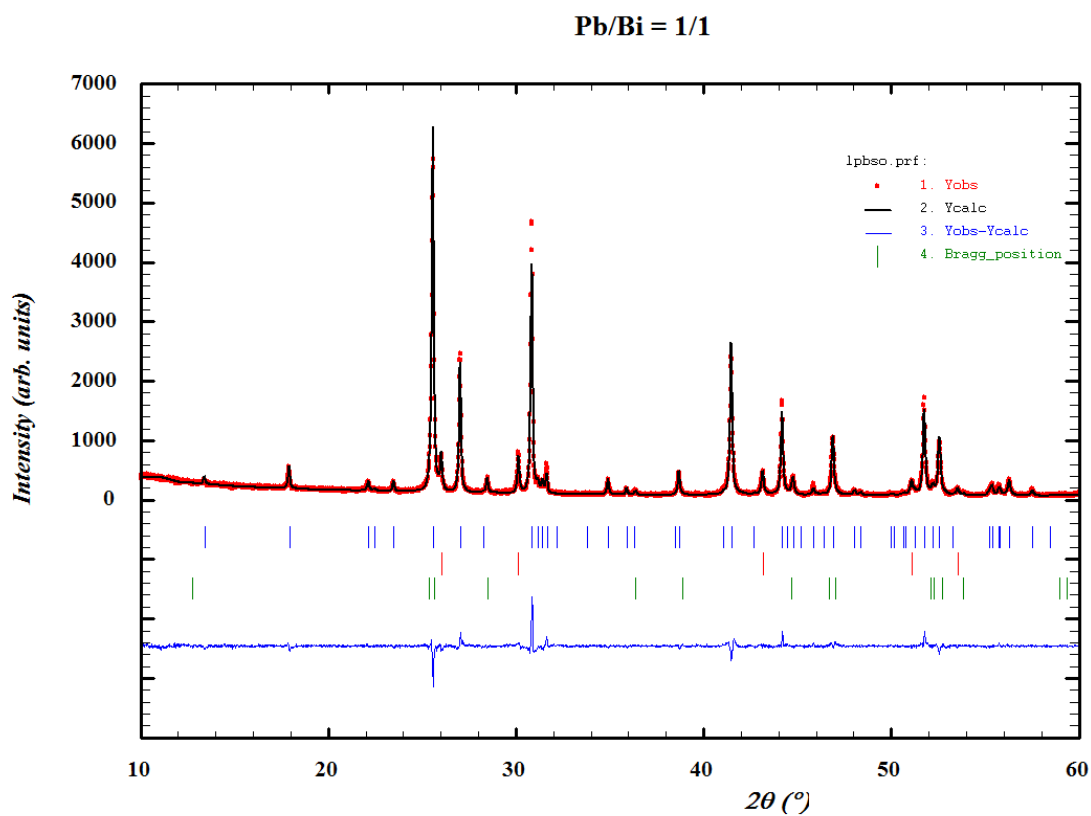

Figure S2a: Rietveld refinement of  $\text{LaOPbBiS}_3$ . Blue Ticks correspond to  $\text{LaOPbBiS}_3$  phase, red ticks to  $\text{PbS}$ , and green ticks to  $\text{La}_2\text{O}_2\text{S}$ .

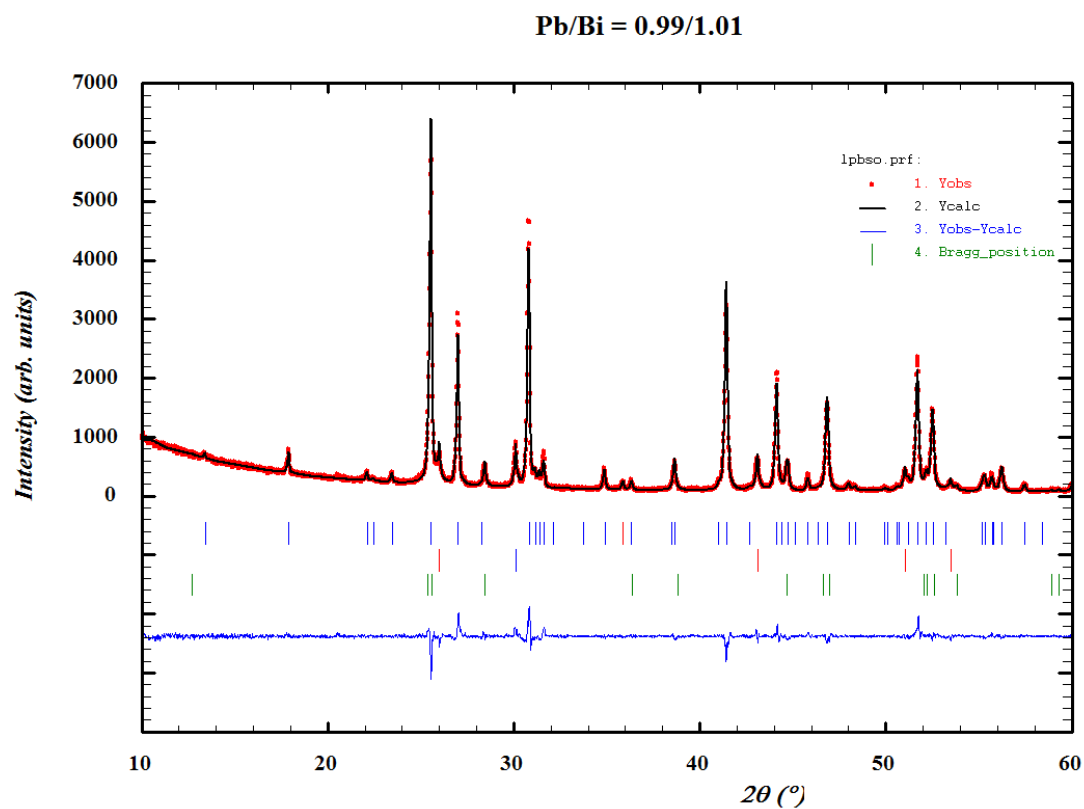

Figure S2b: Rietveld refinement of  $\text{LaOPb}_{0.99}\text{Bi}_{1.01}\text{S}_3$ .

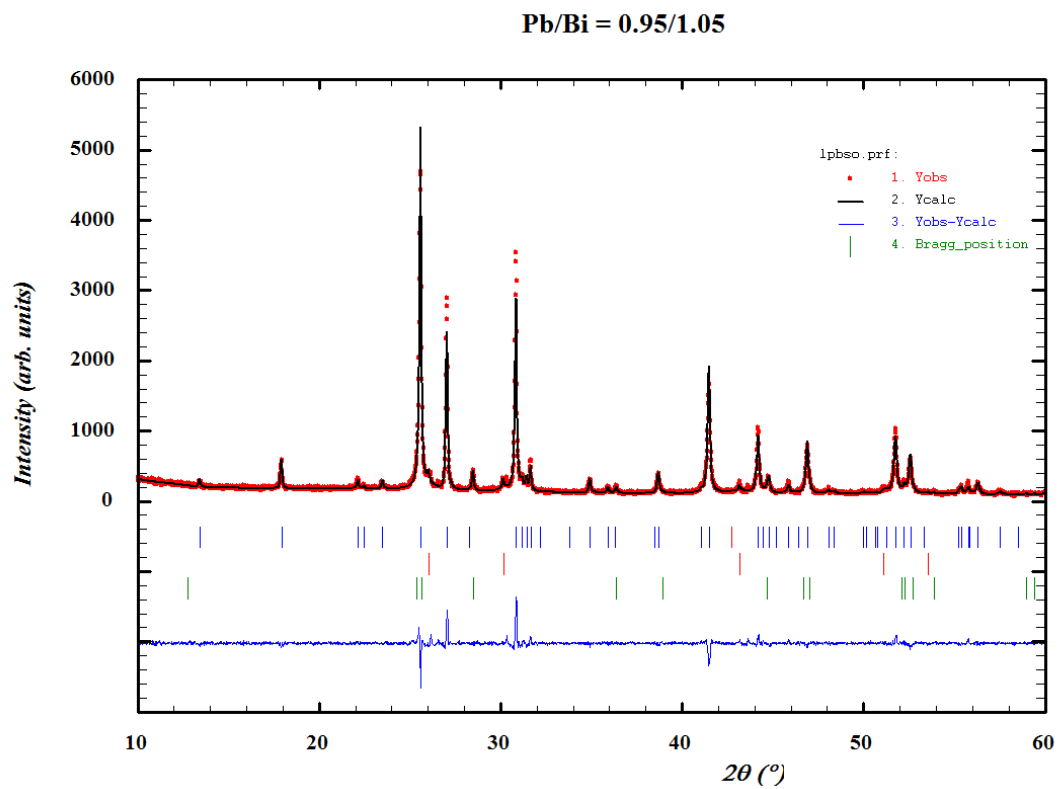

Figure S2c: Rietveld refinement of  $\text{LaOPb}_{0.95}\text{Bi}_{1.05}\text{S}_3$ .

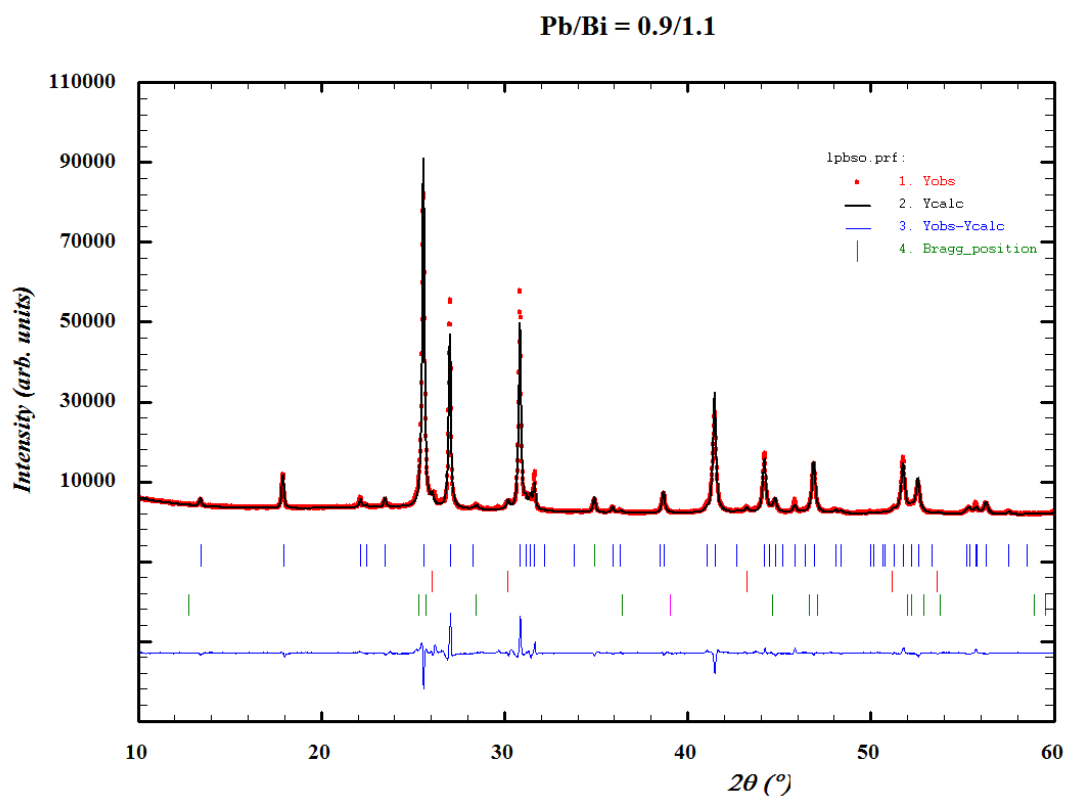

Figure S2d: Rietveld refinement of  $\text{LaOPb}_{0.9}\text{Bi}_{1.1}\text{S}_3$ .

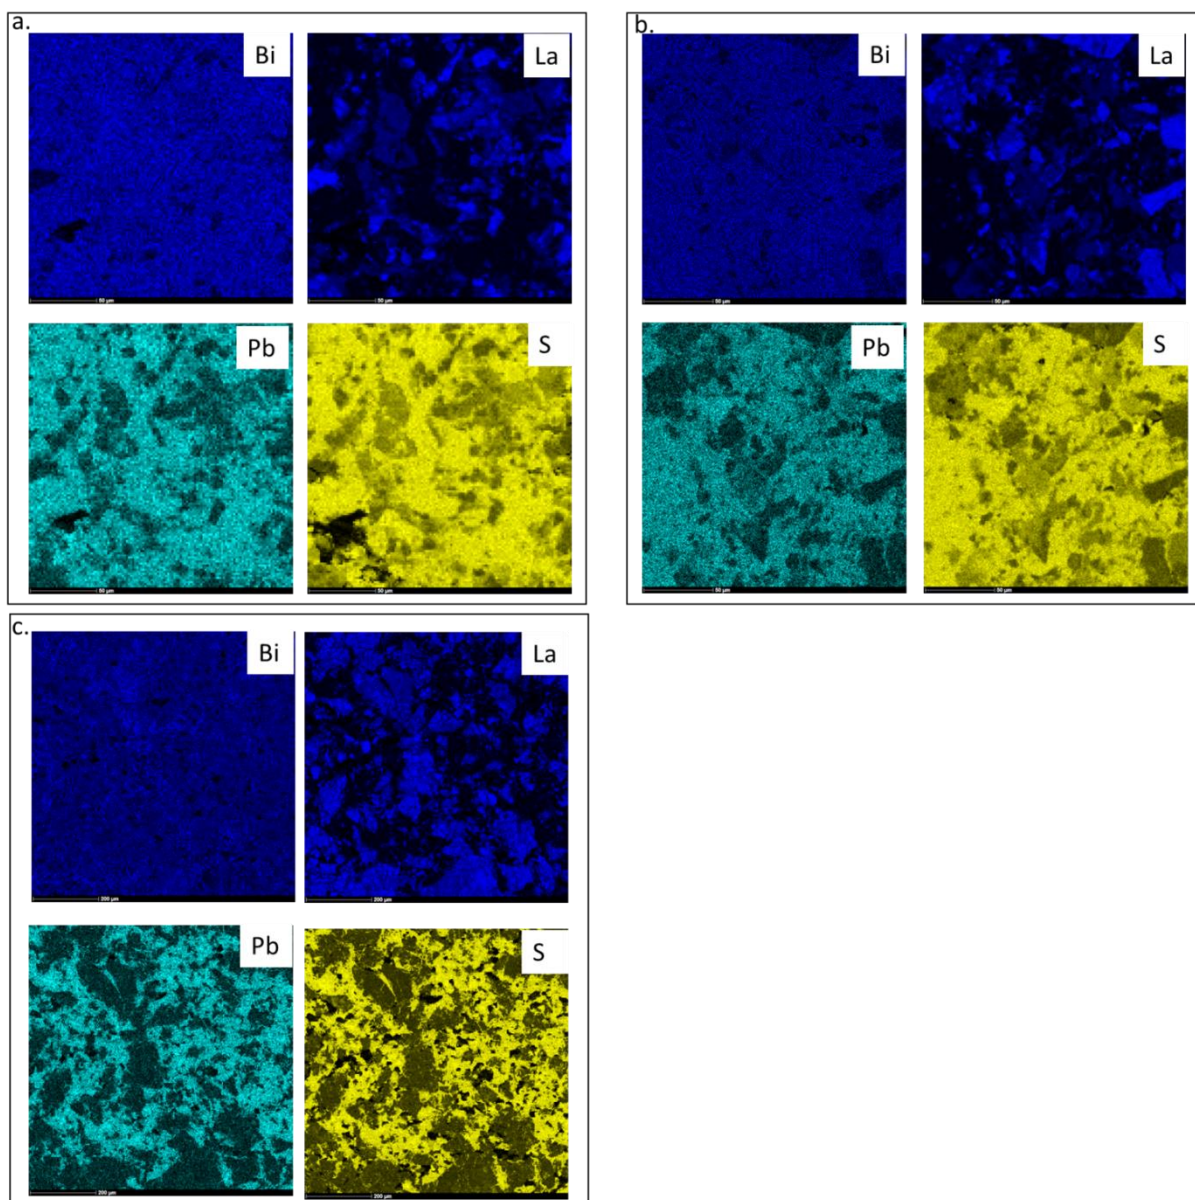

S3: EDX Mapping of  $\text{LaOPb}_{1-y}\text{Bi}_{1+y}\text{S}_3$  synthesized with several proportions of Pb/Bi: 1.05/0.95 (a), 1/1 (b), 0.99/1.01

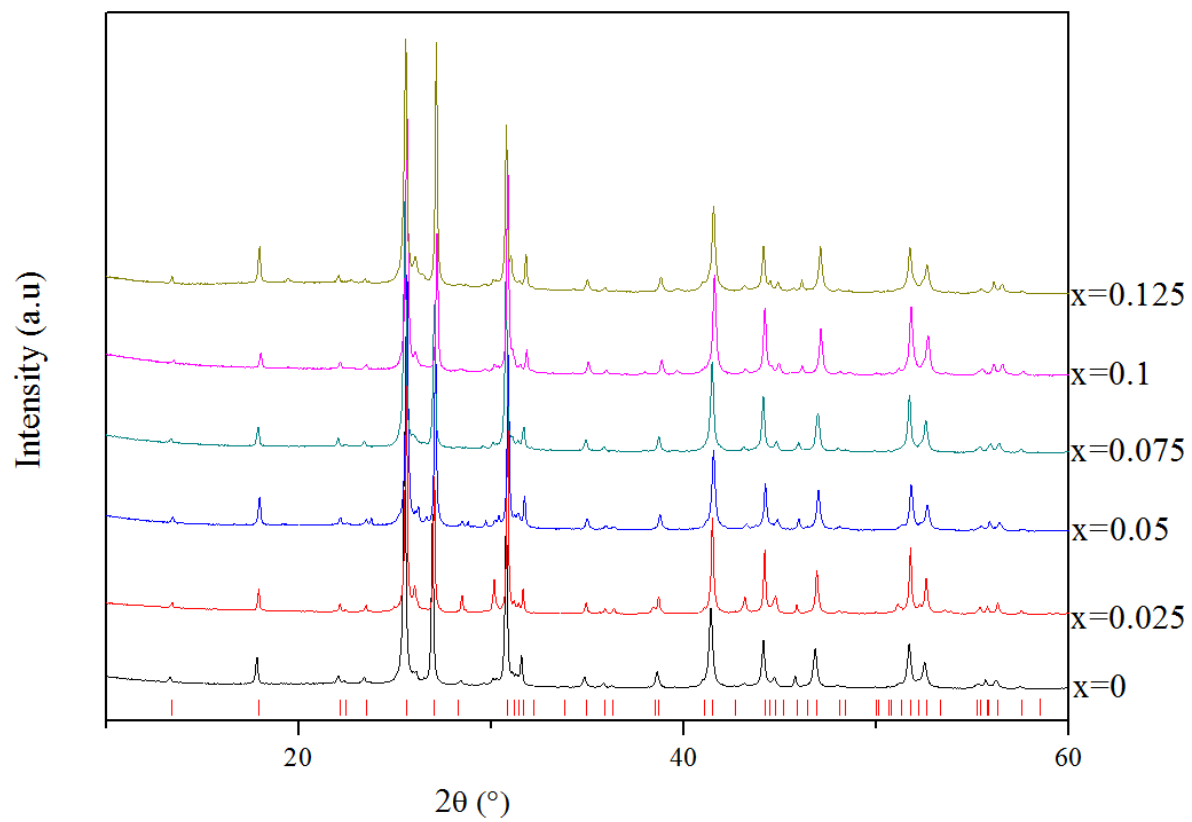

S4: XRD pattern of fluorine-doped samples with nominal composition  $\text{LaO}_{1-x}\text{F}_x\text{Pb}_{0.9}\text{Bi}_{1.1}\text{S}_3$  ( $x=0$  to 0.125).

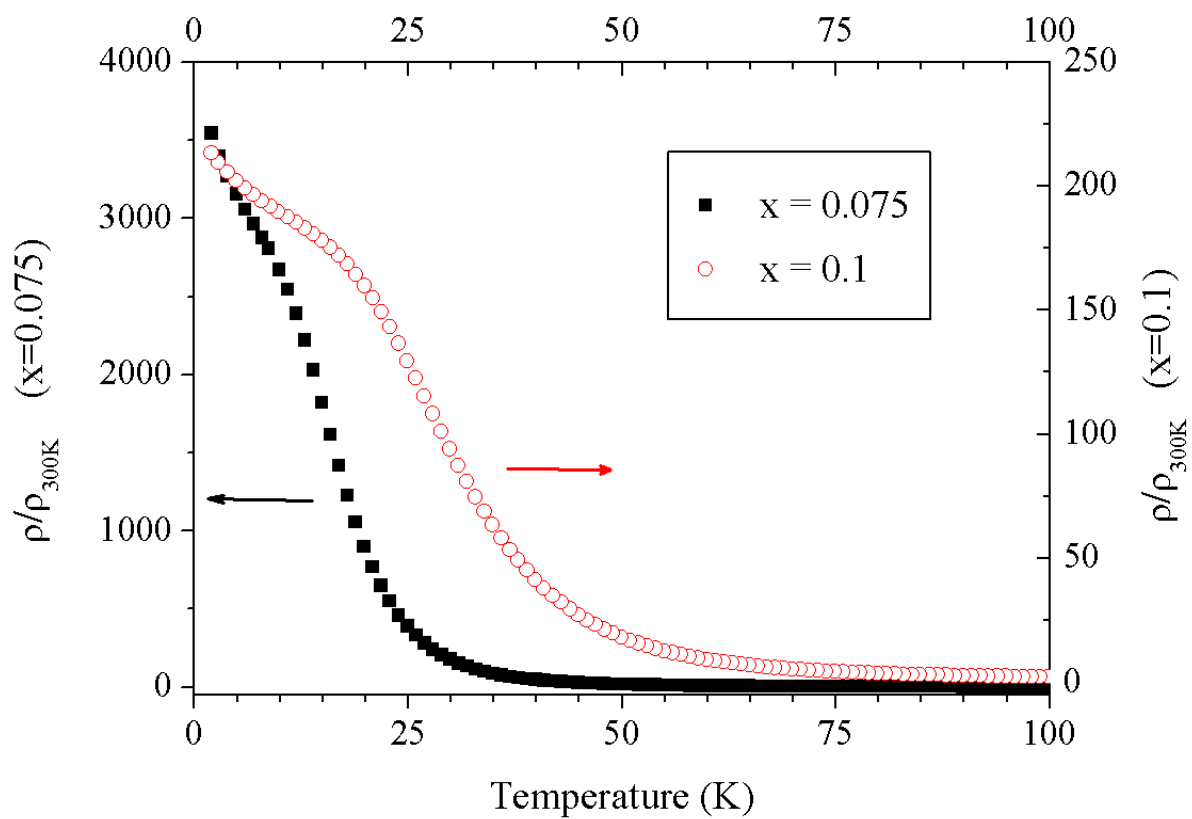

S5: Temperature dependence of the normalized resistivity for fluorine doped  $\text{LaO}_{1-x}\text{F}_x\text{PbBiS}_3$  with  $x=0.075$  and  $x=0.1$ .

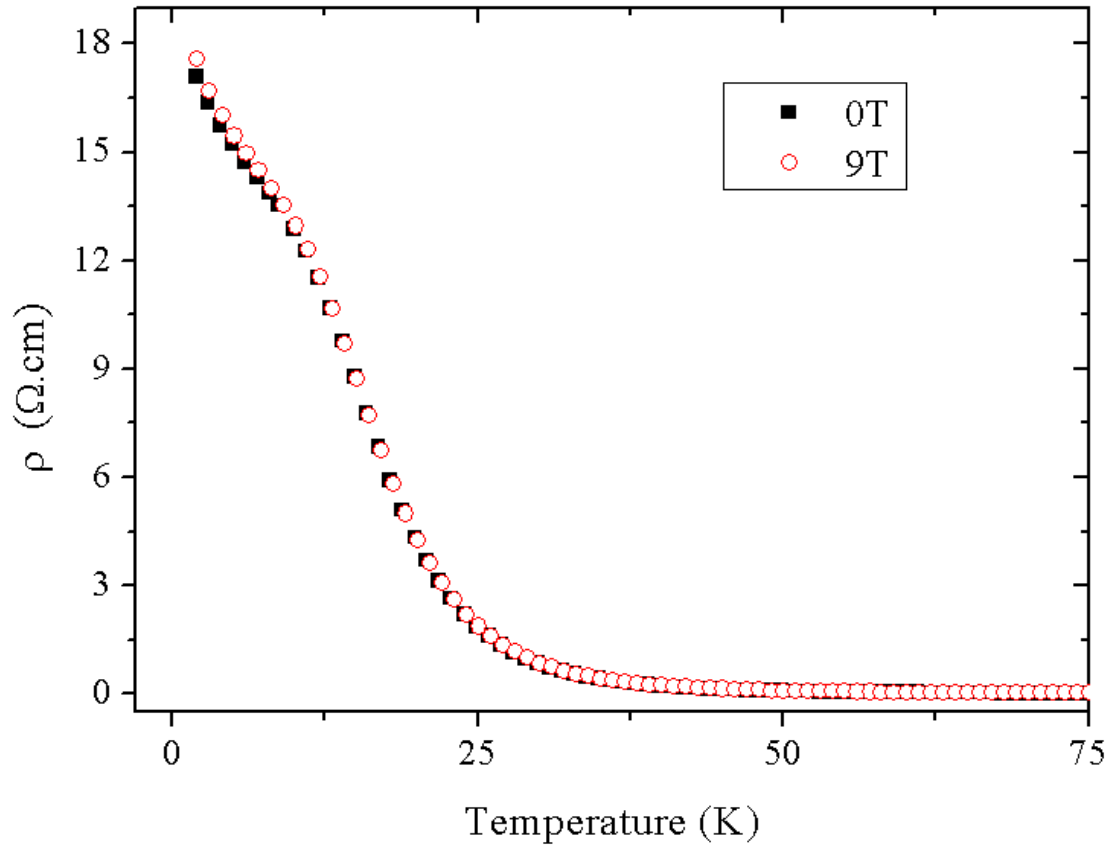

S6: Temperature dependence of the electrical resistivity of  $\text{LaO}_{0.925}\text{F}_{0.075}\text{PbBiS}_3$  under 0T and 9T.

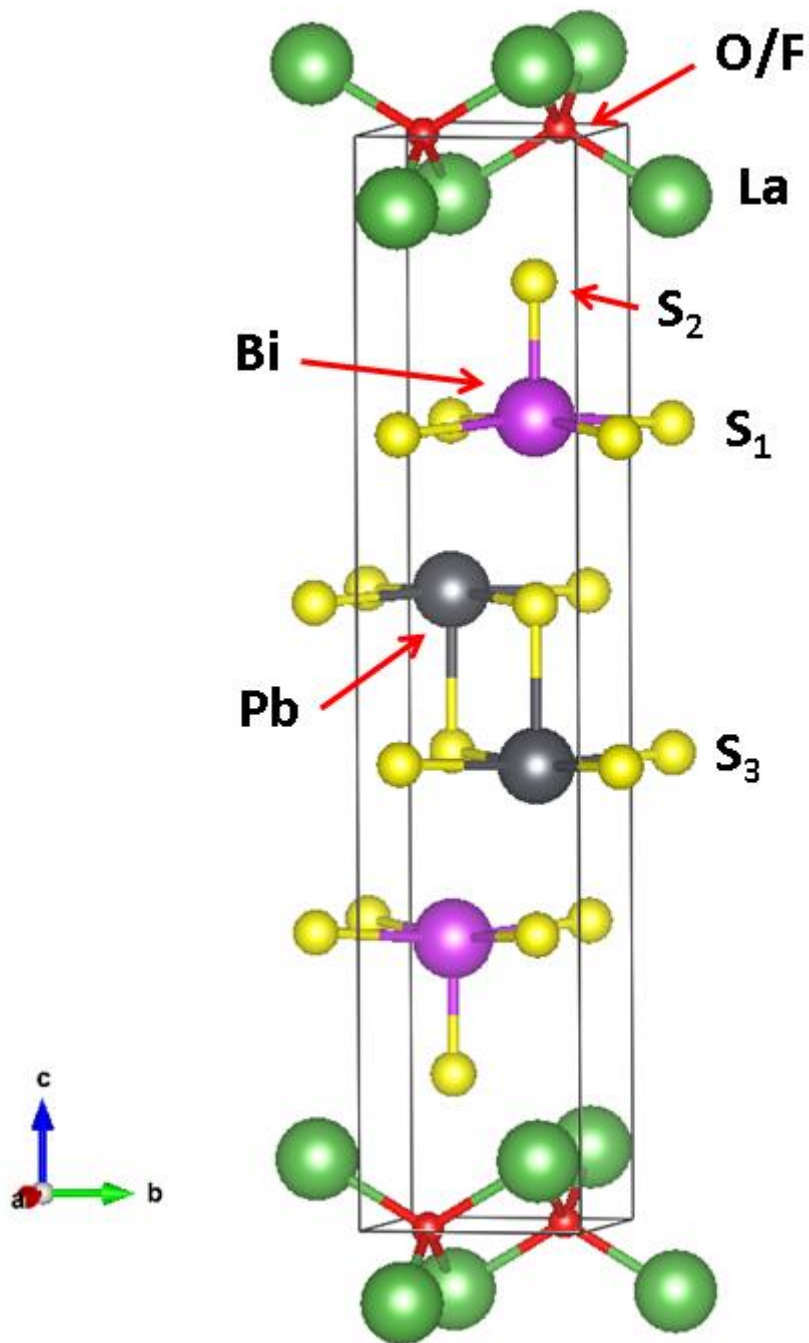

S7: atom position in the unit cell of  $\text{LaO}_{1-x}\text{F}_x\text{PbBiOS}_3$  (with a total segregation of Pb and Bi for simplicity). Drawn using VESTA. <sup>1</sup>



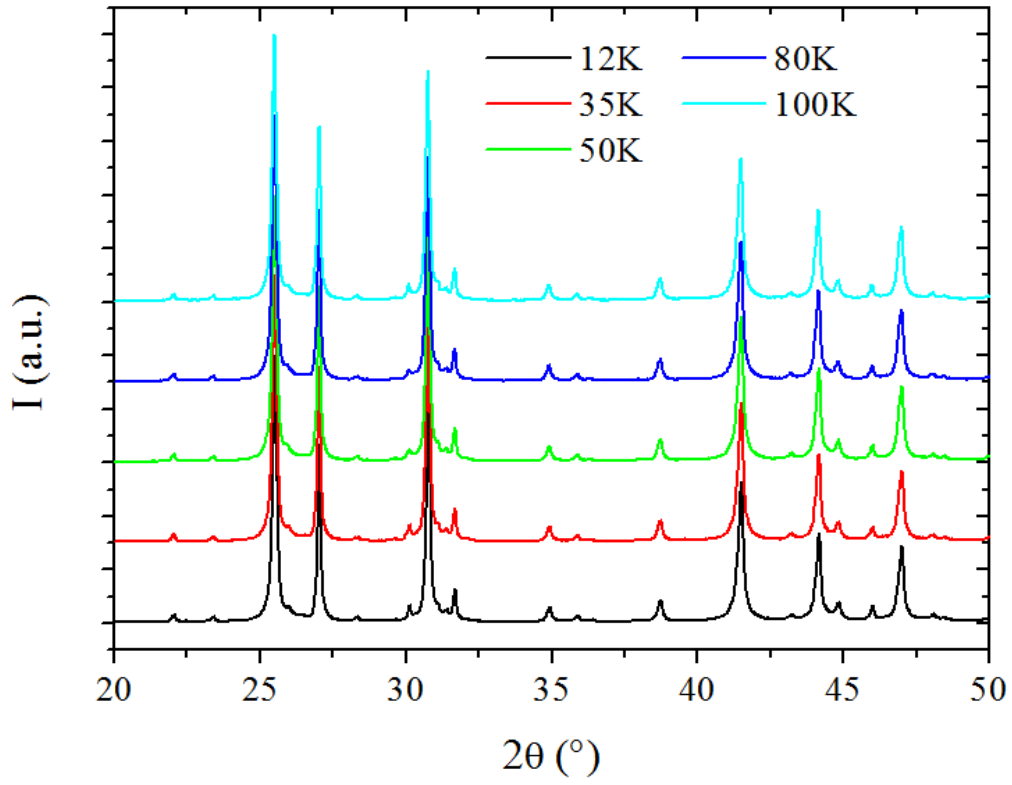

S8: XRD patterns of  $\text{LaO}_{0.925}\text{F}_{0.075}\text{Pb}_{0.9}\text{Bi}_{1.1}\text{S}_3$  at several representative temperatures.

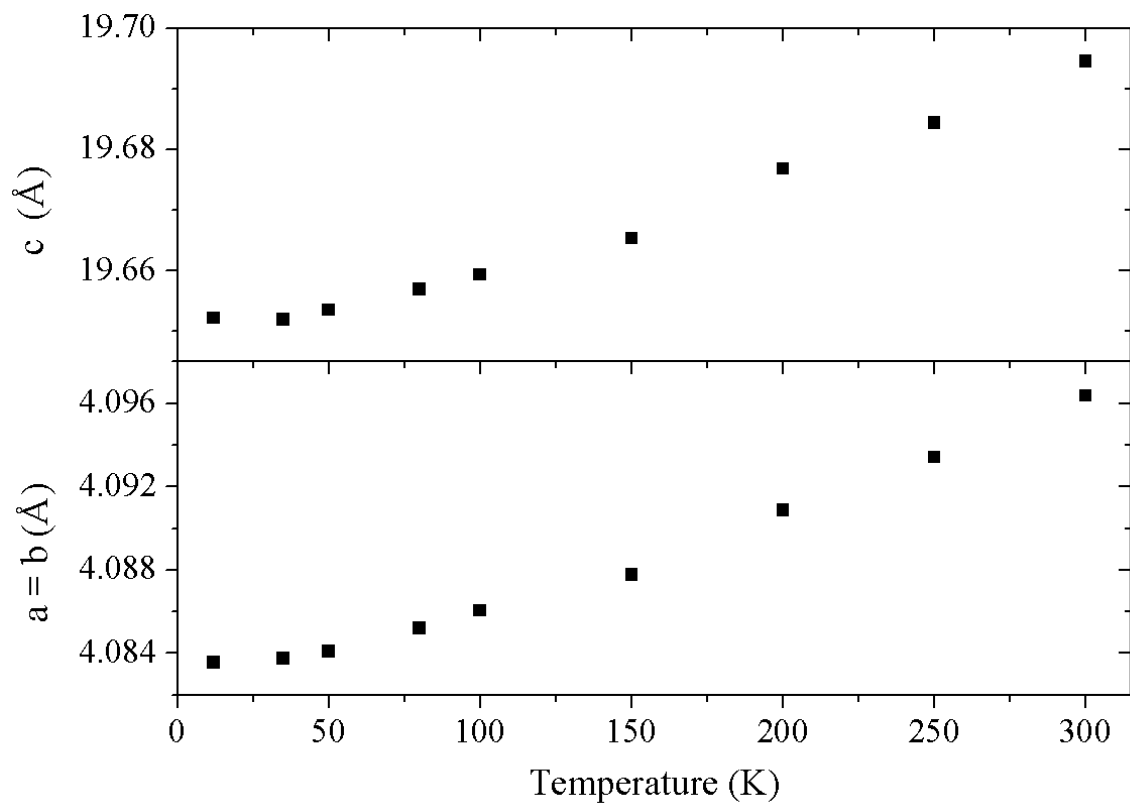

Figure S9: Temperature dependence of the lattice parameters of  $\text{LaO}_{0.925}\text{F}_{0.075}\text{Pb}_{0.9}\text{Bi}_{1.1}\text{S}_3$ .

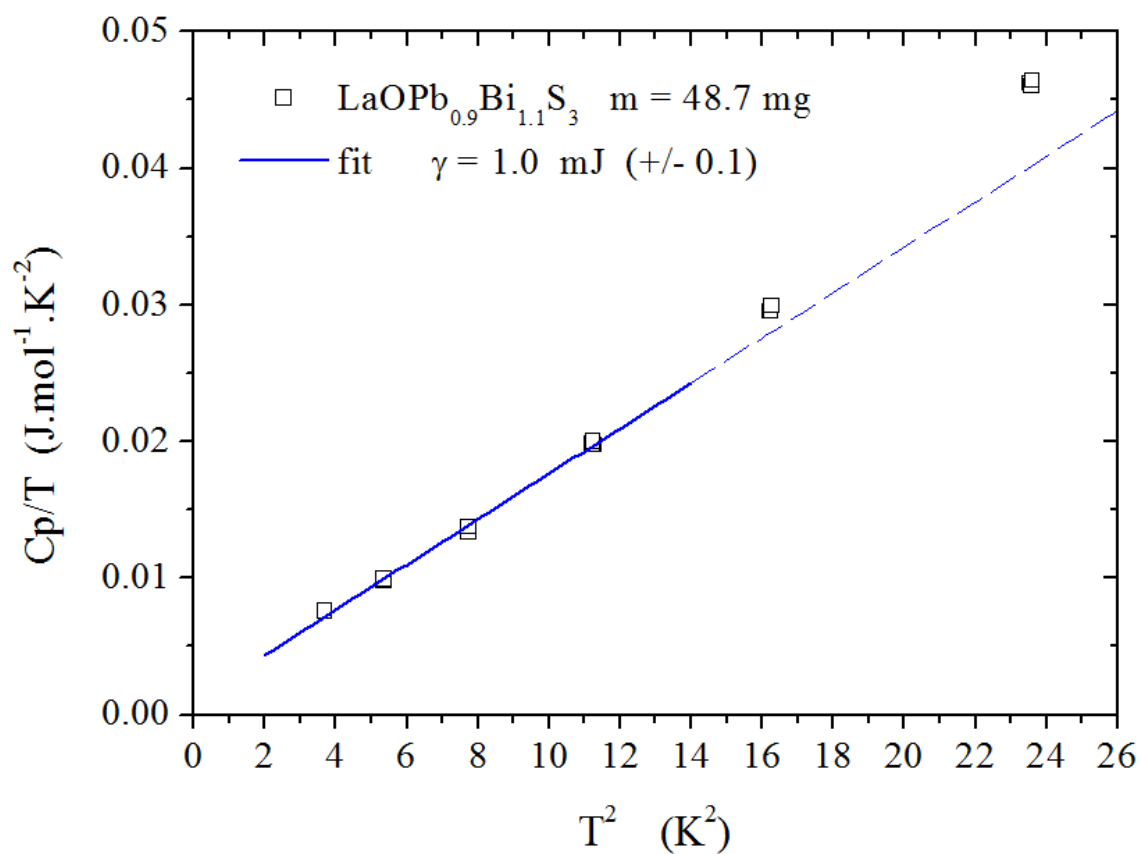

Figure S10: Low temperature fit of the specific heat of  $\text{LaOPb}_{0.9}\text{Bi}_{1.1}\text{S}_3$  using a conventional  $C_p/T$  vs  $T^2$  plot.

#### REFERENCES

1. K. Momma and F. Izumi, *J. Appl. Crystallogr.*, 2011, **44**, 1272.
